# Supplementary material for: Mesenchymal stem-cell-derived exosomal miR-145 inhibits atherosclerosis by targeting JAM-A
Source: PubMed Central journal article supplement — Mol Ther Nucleic Acids. 2020 Nov 4;23:119–31. doi: 10.1016/j.omtn.2020.10.037 (PMC7732974; doi:10.1016/j.omtn.2020.10.037), 2020-11-04
Supplement: mmc1.pdf [file mmc1.pdf]

**OMTN, Volume 23**

## **Supplemental Information**

**Mesenchymal stem-cell-derived exosomal miR-145**

**inhibits atherosclerosis by targeting JAM-A**

**Wenzhi Yang, Ruihua Yin, Xiaoyan Zhu, Shaonan Yang, Jing Wang, Zhenfeng Zhou, Xudong Pan, and Aijun Ma**

## Supplemental Table

| Transcript ID   | P1     | P2     | P3     | P4     | C1     | C2     | C3     | C4     |
|-----------------|--------|--------|--------|--------|--------|--------|--------|--------|
| hsa-miR-6089    | 5.8815 | 6.0176 | 5.7092 | 4.3186 | 2.2838 | 2.6094 | 2.5926 | 2.6583 |
| hsa-miR-3665    | 4.4228 | 5.0276 | 7.3948 | 4.67   | 1.8467 | 1.7191 | 1.1376 | 1.8115 |
| hsa-miR-4466    | 3.8841 | 3.8076 | 6.1035 | 3.3982 | 1.4404 | 1.2016 | 1.3974 | 1.531  |
| hsa-miR-145     | 6.7248 | 6.1233 | 7.8497 | 5.9933 | 4.9387 | 4.5193 | 4.2401 | 4.1014 |
| hsa-miR-3960    | 6.3261 | 6.3688 | 7.7269 | 5.2343 | 3.3909 | 3.3853 | 2.7259 | 5.0171 |
| hsa-miR-1469    | 4.1899 | 4.0587 | 3.8483 | 3.6882 | 1.8238 | 1.8922 | 1.6912 | 1.4966 |
| hsa-miR-3613-3p | 6.1073 | 7.0654 | 6.3914 | 4.5679 | 2.0186 | 3.2702 | 3.3866 | 6.3175 |
| hsa-miR-4787-5p | 7.2113 | 5.6436 | 6.9859 | 5.4183 | 3.9602 | 3.1439 | 3.6521 | 4.7259 |
| hsa-miR-5787    | 7.7236 | 6.5041 | 6.729  | 6.2476 | 5.1015 | 4.5979 | 4.8702 | 5.0753 |
| hsa-miR-1915-3p | 3.8927 | 3.074  | 4.0786 | 3.5911 | 1.193  | 1.3696 | 1.7142 | 1.8382 |
| hsa-miR-6087    | 3.4074 | 2.2656 | 5.0034 | 3.8213 | 1.9509 | 1.5661 | 1.3693 | 1.3529 |
| hsa-miR-3620-5p | 4.6507 | 3.0296 | 3.8177 | 3.3685 | 1.8679 | 1.6031 | 1.7307 | 1.2559 |
| hsa-miR-6869-5p | 3.7276 | 3.8349 | 3.8683 | 3.4293 | 1.5147 | 1.8348 | 1.7891 | 1.7084 |

**Supplemental Table S1. Relative expression of the top 10 DEGs**

| Gene Name | Tarbase Methods |
|-----------|-----------------|
| PRKCA     | HITS-CLIP       |
| ITGB1     | qPCR            |
| MAPK14    | Western Blot    |
| ACTG1     | Multiple        |
| OCLN      | qPCR            |
| MSN       | qPCR            |
| PTK2      | qPCR            |
| MMP2      | Multiple        |
| CTNNB1    | qPCR            |
| MMP9      | Multiple        |
| RAC1      | qPCR            |
| F11R      | Multiple        |

**Supplemental Table S2. The predicted target genes of miR-145**

## Supplemental figure and figure legend

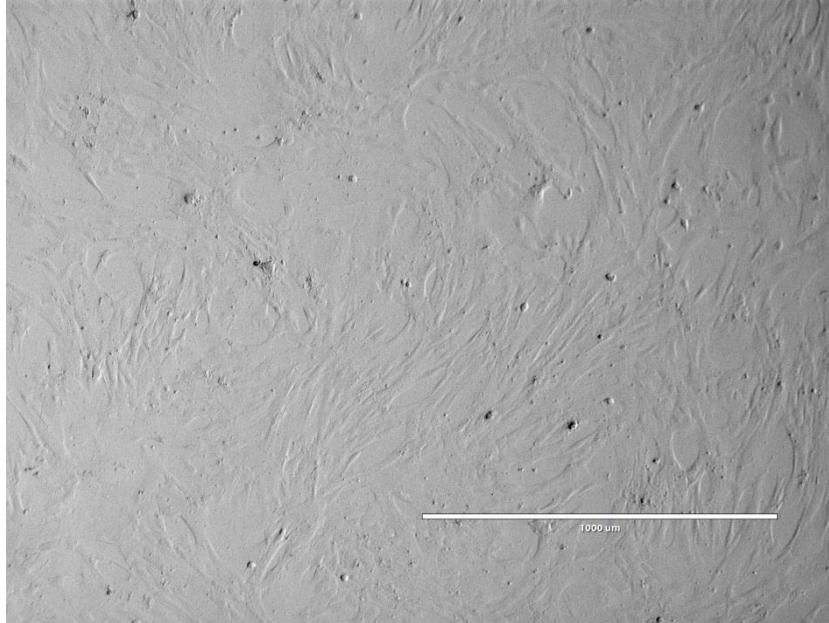

**Supplementary Figure S1. The isolated HUC-MSCs.**

The scale bar= 1000μm.
